# Supplementary material for: Improving Environmental DNA Sensitivity for Dreissenid Mussels by Targeting Tandem Repeat Regions of the Mitochondrial Genome
Source: MDPI journal article supplement (doi:10.3390/w14132069), 2022-06-28
Supplement: s1 [file s1]

## Supplementary Information

**Table S1.** Gene regions across the nuclear (nu-) and mitochondrial (mt-) genomes used for developing diagnostic molecular assays targeting zebra mussel (*Dreissena polymorpha*), quagga mussel (*D. rostriformis*), or both. The number of copies of each gene per haploid nuclear genome is estimated from the assembled zebra mussel nuclear genome from NCBI (BioProject: PRJNA533175), the copies of each gene per mitochondrial genome is estimated from the assembled zebra mussel mitochondrial genome from NCBI (BioProject: PRJNA533175) and the assembled quagga mussel mitochondrial genome from NCBI (BioProject: PRJNA666063 – accession MW080914).

| Target Gene      | Number of Assays | Number of Copies per Genome | Source for assay development (References)                                 |
|------------------|------------------|-----------------------------|---------------------------------------------------------------------------|
| nu-18S           | 2                | 30                          | [14], [48]*                                                               |
| nu-28S           | 2                | 20                          | [49]                                                                      |
| nu-H2B           | 2                | 19                          | [19], [34]                                                                |
| nu-H1            | 1                | 19                          | [19]                                                                      |
| nu-MetRS         | 1                | 6                           | [19]                                                                      |
| mt-16S           | 4                | 1                           | [16], [34], [50], [51]                                                    |
| mt-COI           | 16               | 1                           | [16], [17], [18], [22], [34], [48]* [50], [52]*, [53], [54]*, [55]*, [56] |
| mt-Cyt <i>b</i>  | 1                | 1                           | [16]                                                                      |
| mt-repeat region | 0                | ~50-100                     | This study                                                                |

\* Indicates studies implementing loop-mediated isothermal amplification (LAMP) or light transmission spectroscopy (LTS) methodologies

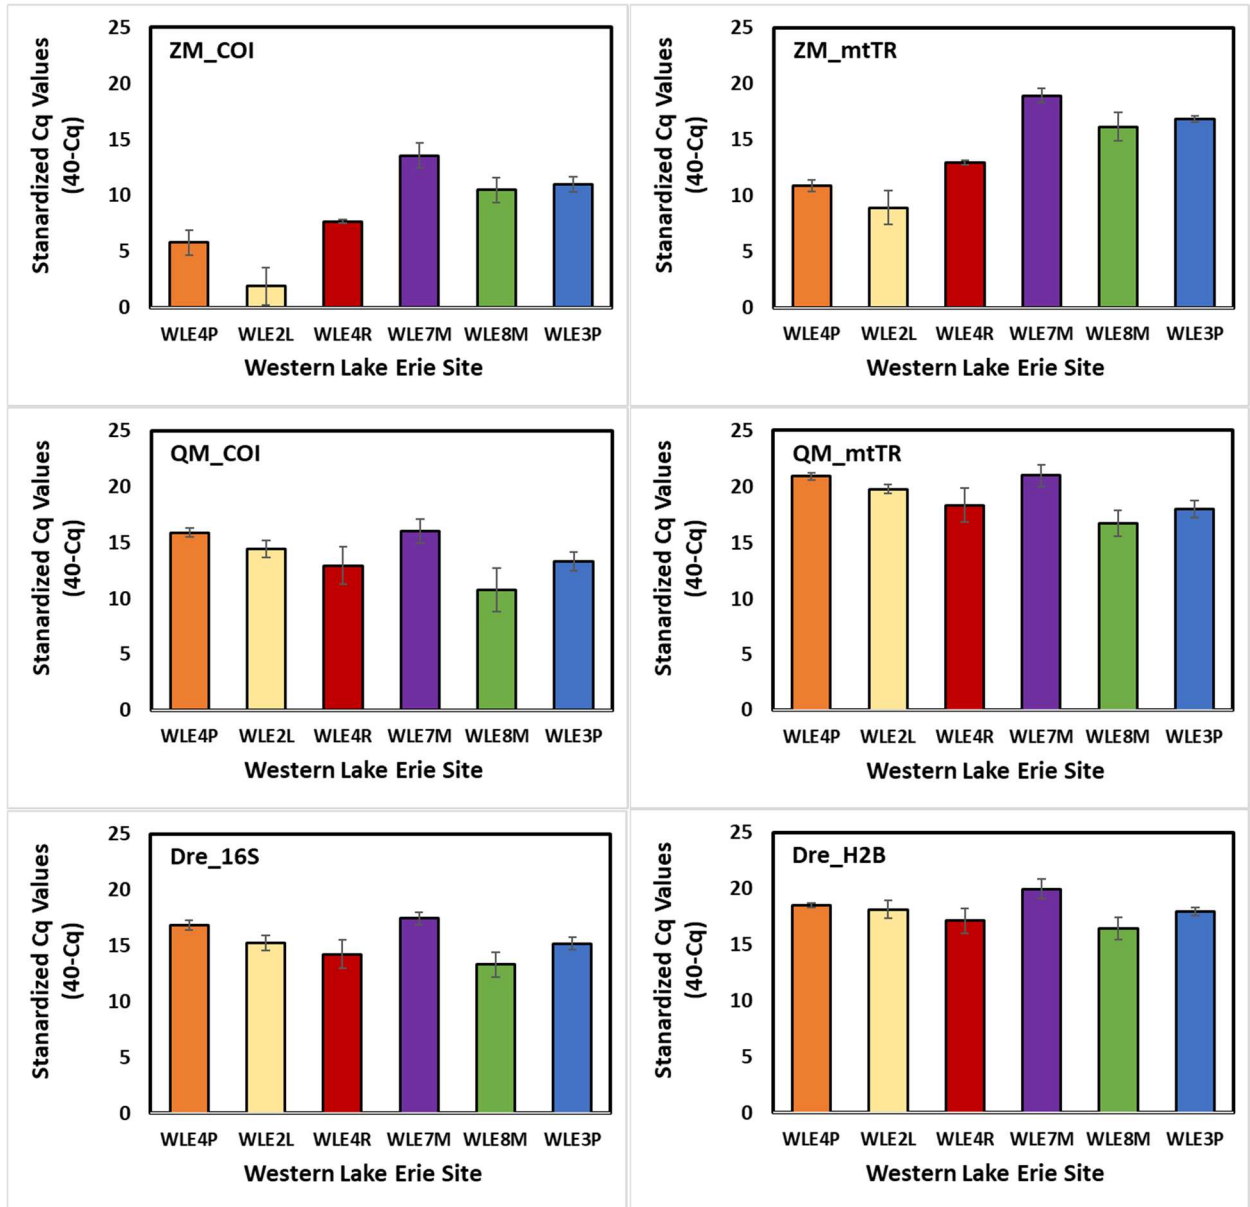

**Figure S1.** The Standardized Cq values ( $\pm$  standard deviation) across water samples collected from six sites in western Lake Erie for ZM\_COI, ZM\_mtTR, QM\_COI, QM\_mtTR, Dre\_16S, and Dre\_H2B.

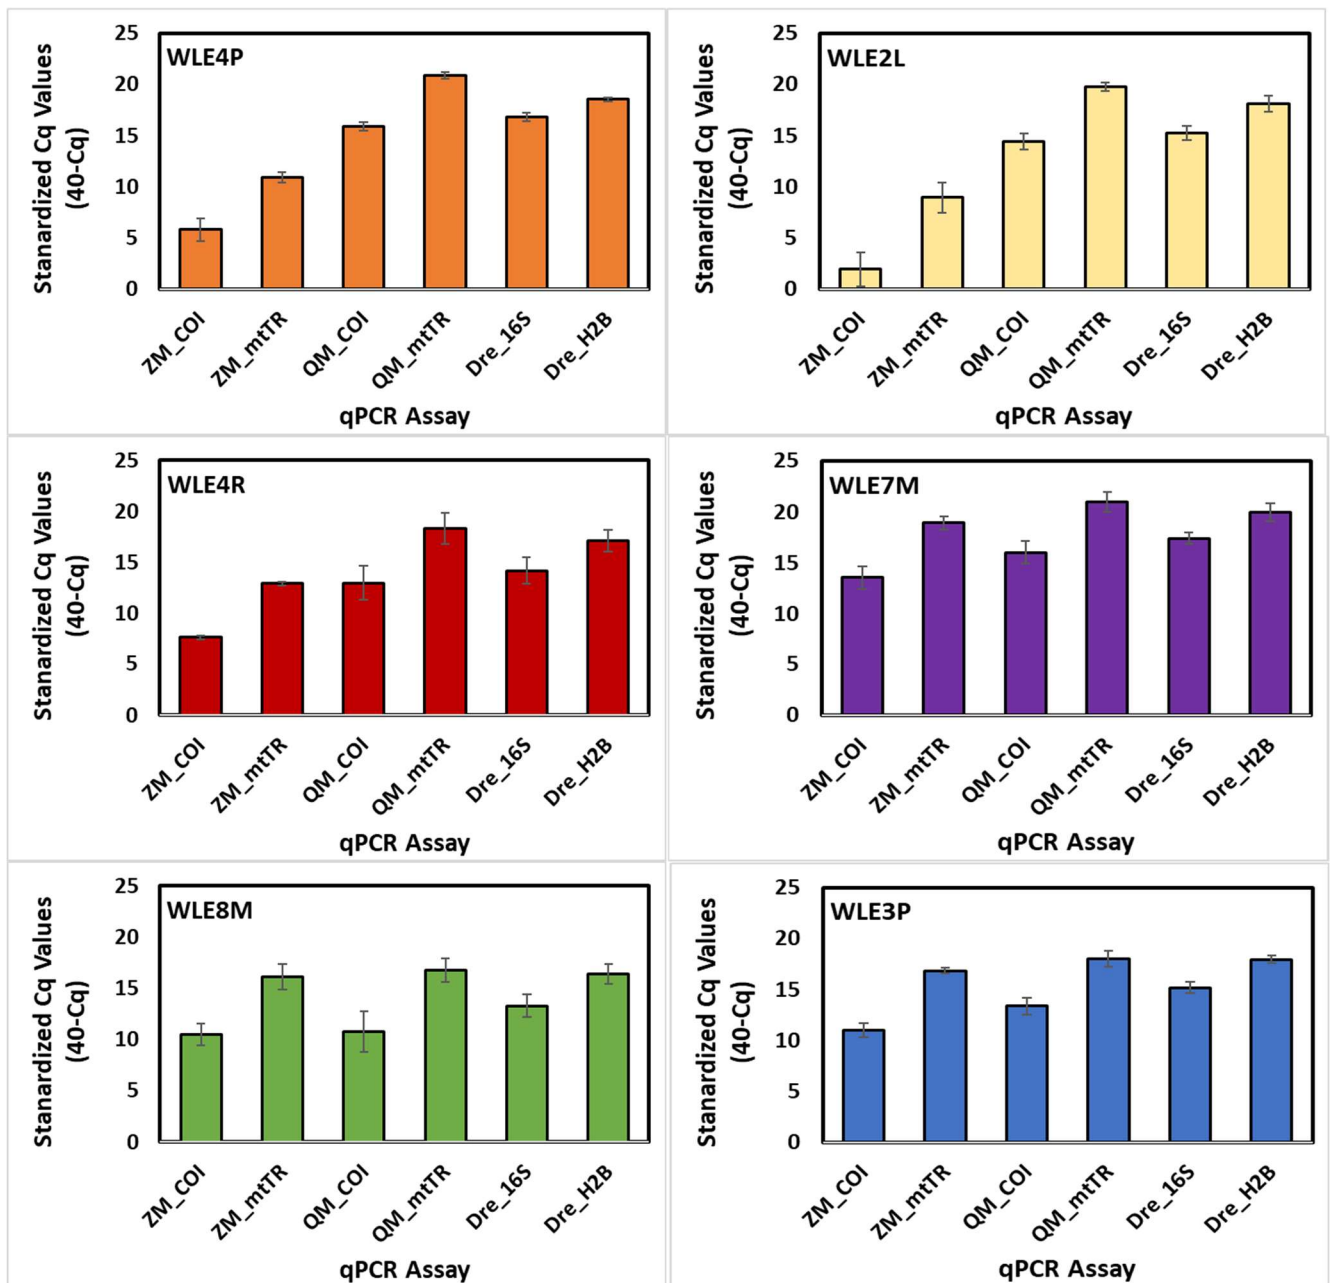

**Figure S2.** The Standardized Cq values ( $\pm$  standard deviation) for each of the six eDNA assays from triplicate water samples collected at WLE4P, WLE2L, WLE4R, WLE7M, WLE8M, and WLE3P.
